# Supplementary material
Source: PubMed Central journal article supplement (PMC5561275)
Supplement: AEM.01174-17_zam999118027s1.pdf [file AEM.01174-17_zam999118027s1.pdf]

**Supplemental Material**

**Molybdenum-based diazotrophy in a *Sphagnum* peatland in northern Minnesota**

Melissa J. Warren<sup>1\*</sup>, Xueju Lin<sup>2\*\*</sup>, John C. Gaby<sup>3\*\*\*</sup>, Cecilia B. Kretz<sup>1\*\*\*\*</sup>, Max Kolton<sup>2</sup>, Peter L. Morton<sup>3</sup>, Jennifer Pett-Ridge<sup>4</sup>, David J. Weston<sup>5</sup>, Christopher W. Schadt<sup>5</sup>, Joel E. Kostka<sup>1,2</sup>, Jennifer B. Glass<sup>1,2#</sup>

<sup>1</sup>School of Earth and Atmospheric Sciences, Georgia Institute of Technology, Atlanta, GA, USA

<sup>2</sup>School of Biology, Georgia Institute of Technology, Atlanta, GA, USA

<sup>3</sup>Department of Earth, Ocean and Atmospheric Science, Florida State University, Tallahassee, Florida, USA

<sup>4</sup>Physical and Life Sciences Directorate, Lawrence Livermore National Laboratory, Livermore, CA, USA

<sup>5</sup>Biosciences Division, Oak Ridge National Laboratory, Oak Ridge, TN, USA

Now at: \*CH2M, Atlanta, GA, USA; \*\*InstantLabs, Baltimore, MD, USA; \*\*\*Faculty of Chemistry, Biotechnology and Food Science, Norwegian University of Life Sciences, Oslo, Norway; \*\*\*\*Division of Bacterial Diseases, National Center for Immunization and Respiratory Diseases, Centers for Disease Control and Prevention, Atlanta, GA, USA

#Corresponding author: Jennifer B. Glass, 404-894-3942; jennifer.glass@eas.gatech.edu

Running Title: Nitrogen fixation in a *Sphagnum* peat bog

**Table S1. Dissolved trace metal concentrations in S1 transect 3 (far, mid and near sites).**

BD indicates “below detection” and N/A indicates that the element of interest was not analyzed.

| Site                  | Type    | Depth (cm) | V   | Mn    | Fe     | Co  | Ni  | Cu  | Zn  | Mo |
|-----------------------|---------|------------|-----|-------|--------|-----|-----|-----|-----|----|
| <b>June 2014</b>      |         |            |     |       |        |     |     |     |     |    |
| Far                   | Hummock | 0-10       | 10  | 487   | 4,081  | 1   | N/A | 30  | 344 | 1  |
|                       |         | 0-10       | 14  | 443   | 1,797  | 5   | N/A | 11  | 208 | 4  |
|                       | Hollow  | 30-50      | 14  | 186   | 1,920  | 7   | N/A | 13  | 275 | 2  |
| 100-150               |         | 8          | 115 | 1,149 | 3      | N/A | 12  | 228 | 1   |    |
| Mid                   | Hummock | 0-10       | 13  | 2,222 | 3,527  | 3   | N/A | 29  | 534 | 1  |
|                       |         | 0-10       | 11  | 555   | 21,112 | 5   | N/A | 16  | 284 | 1  |
|                       | Hollow  | 30-50      | 21  | 158   | 6,800  | 4   | N/A | 20  | 186 | 4  |
| 100-150               |         | 5          | 60  | 7,907 | 2      | N/A | 12  | 154 | 7   |    |
| Near                  | Hummock | 0-10       | 8   | 445   | 2,483  | 1   | N/A | 25  | 227 | 1  |
|                       |         | 0-10       | 9   | 1,148 | 24,030 | 5   | N/A | 8   | 474 | 4  |
|                       | Hollow  | 30-50      | 12  | 284   | 14,139 | 6   | N/A | 12  | 143 | 2  |
| 100-150               |         | 12         | 69  | 7,071 | 4      | N/A | 9   | 86  | 5   |    |
| <b>September 2014</b> |         |            |     |       |        |     |     |     |     |    |
| Far                   | Hollow  | 0-10       | BD  | 289   | 22,576 | 9   | 23  | 8   | 211 | BD |
|                       |         | 30-50      | BD  | 368   | 11,818 | 15  | 83  | 7   | 251 | 5  |
|                       |         | 100-150    | BD  | 231   | 9,975  | 7   | 17  | 8   | 48  | BD |
| Mid                   | Hollow  | 0-10       | BD  | 309   | 34,980 | 15  | 34  | 38  | 123 | BD |
|                       |         | 30-50      | BD  | 89    | 30,816 | 3   | 9   | 20  | 202 | BD |
|                       |         | 100-150    | BD  | 213   | 23,035 | 10  | 19  | 9   | 223 | BD |

Table S2. Statistics for metagenome sequences and *nifH* gene cluster I-IV analysis.

| Sample      | Sample       | raw #<br>seqs | #<br>sequences | #<br>functional<br>genes | #nifH<br>genes | I  | II | III | IV/V | non<br>assigned |
|-------------|--------------|---------------|----------------|--------------------------|----------------|----|----|-----|------|-----------------|
| T3M<br>0cm  | T3M 0<br>R1  | 23149446      | 20636767       | 5419176                  | 1203           | 23 | 4  | 27  | 42   | 1               |
|             | T3M 0<br>R2  | 23149446      | 20636767       | 4834626                  |                |    |    |     |      |                 |
| T3M<br>30cm | T3M<br>30 R1 | 23396969      | 21420027       | 5864331                  | 1304           | 18 | 1  | 53  | 26   | 1               |
|             | T3M<br>30 R2 | 23396969      | 21420027       | 5626796                  |                |    |    |     |      |                 |
| T3M<br>75cm | T3M<br>75 R1 | 22408842      | 20698248       | 4244995                  | 511            | 34 | 0  | 31  | 34   | 0               |
|             | T3M<br>75 R2 | 22408842      | 20698248       | 4548589                  |                |    |    |     |      |                 |
| T3F<br>0cm  | T3F 0<br>R1  | 17800326      | 16292777       | 3761428                  | 28944          | 49 | 4  | 21  | 25   | 1               |
|             | T3F 0<br>R2  | 17800326      | 16292777       | 3585934                  |                |    |    |     |      |                 |
| T3F<br>30cm | T3F 30<br>R1 | 30686580      | 27965337       | 7598974                  | 58075          | 49 | 5  | 23  | 22   | 1               |
|             | T3F 30<br>R2 | 30686580      | 27965337       | 7374546                  |                |    |    |     |      |                 |
| T3F<br>75cm | T3F 75<br>R1 | 909520        | 824421         | 195481                   |                |    |    |     |      |                 |
|             | T3F 75<br>R2 | 909520        | 824421         | 205646                   |                |    |    |     |      |                 |

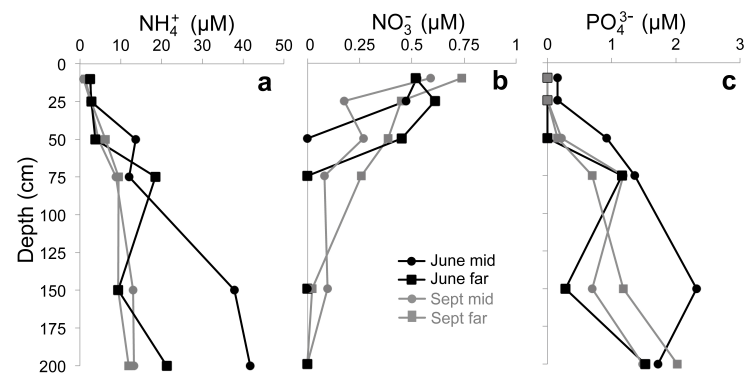

Figure S1. Depth profiles of dissolved (a) ammonium, (b) nitrate, and (c) phosphate from S1 T3 peat bog middle (circles) and far (squares) sites. Black symbols are from June 2014; gray symbols are from September 2014.

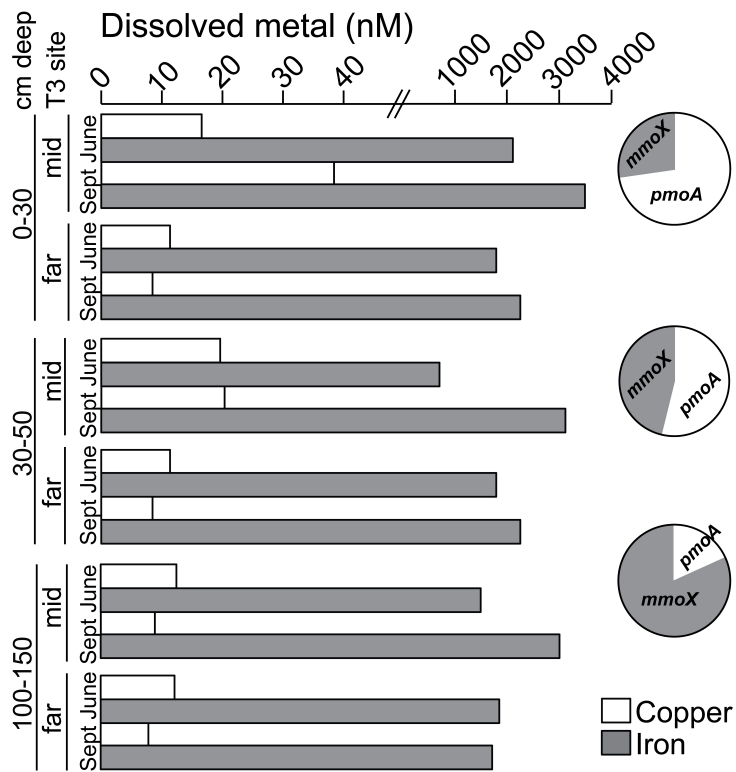

**Figure S2. Dissolved copper (white) and iron (shaded) concentrations in pore water from three depths in S1 peat hollows (mid and far sites along T3 transect) in June 2015.** Pie charts show the relative abundance of *pmoA* (Cu-containing particulate methane monooxygenase) and *mmoX* (Fe-containing soluble methane monooxygenase) sequences recovered from metagenomes from T3 mid sites (0-10, 25-50, and 75-100 cm).

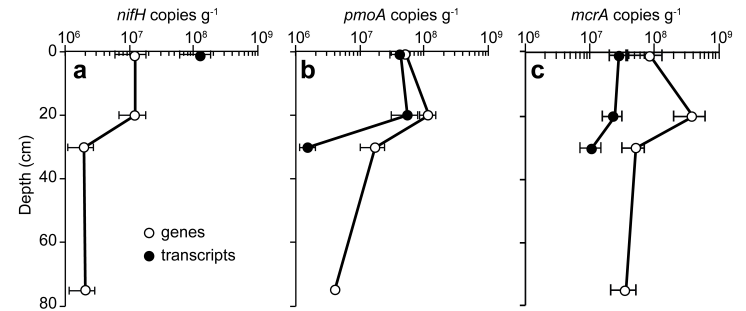

**Figure S3. Depth profiles of copy numbers for DNA (white) and cDNA (black) for (a) *nifH*, (b) *pmoA* and (c) *mcrA* in units of copies per gram of dry weight for the S1 bog T3 mid site.** Panel (b) is modified from Esson, et al. (1).

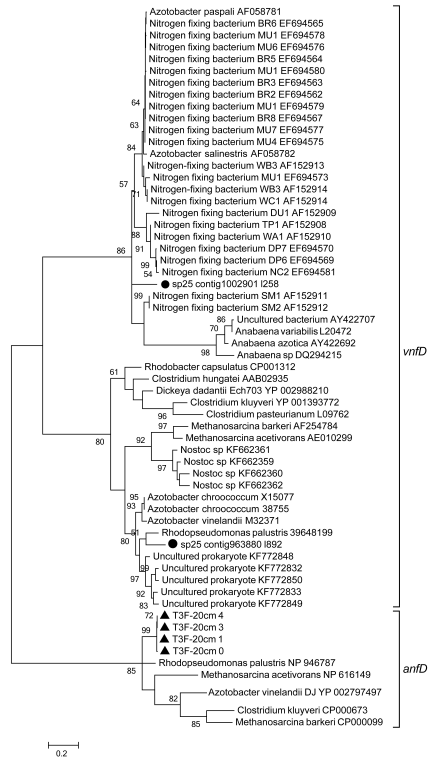

**Figure S4. Evolutionary history of retrieved *vnf* and *anf* genes inferred using the Maximum Likelihood method.** Black circles represent two assembled metagenomic *vnfD* reads from the S1 bog T3F site (25 cm depth). Black triangles represent *anfD* amplicons from S1 bog T3F site (20 cm depth). The percentage of trees in which the associated taxa clustered together is shown next to the branches.

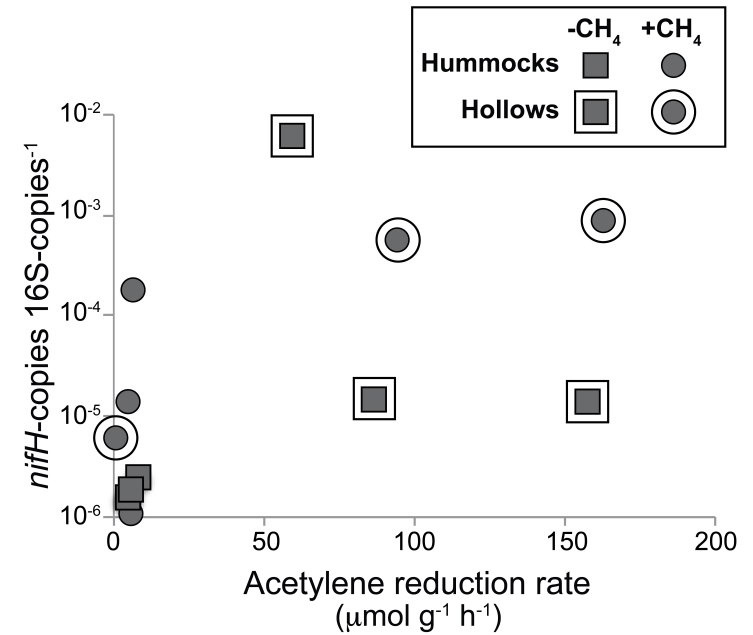

**Figure S5. Correlation between *nifH*:16S rRNA cDNA transcript ratios and acetylene reduction rates for hummock and hollow (line around symbols) peat bog samples from June 2014 incubated under 80%N<sub>2</sub>+20% CO<sub>2</sub> headspace with (circles) and without (squares) 1% CH<sub>4</sub>.** When normalized to dry peat, these data range from 10<sup>3</sup> to 10<sup>7</sup> *nifH* copies g<sup>-1</sup>.

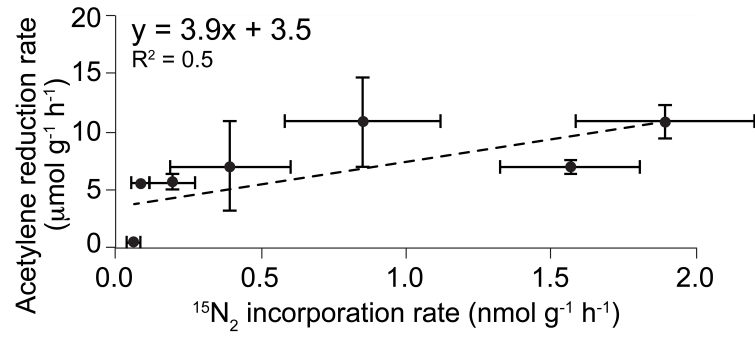

Figure S6. Correlation between ARA and <sup>15</sup>N<sub>2</sub> incorporation. The slope of the graph is the conversion factor (3.9).

Figure S7. Universal *nifH* primer sequences aligned with corresponding template from methanogen (cluster III) *nifH* genes.

| primer name (position*)    | PolF (115-134)        | PolR (457-476)       | F1 (25-50)                    | R6 (457-473)            |
|----------------------------|-----------------------|----------------------|-------------------------------|-------------------------|
| primer sequence (5' to 3') | TGGGATGCGAARIBBAGACTC | ATBGGCATCATYTRCCGGGA | TAYGGIARBRGGIGIAYGGIARITC     | GCCATCATYTCIGGGA        |
| Mbo <sup>b</sup>           | ---C-G-A-G---T---     | -G---G---C---        | -C-A-A-C-T-C-A-A-             | ---G-T-C-G---           |
| Mac                        | ---C-A-A-A---         | -T---T-T-ACT---      | -T-A-G-C-C-T-A-A-             | ---G-T-T-ACT---         |
| Mmg                        | -T-C-C-C-A-A---       | -T---T-C-C-ACT---    | -C-A-G-C-C-T-A-A-             | ---G-T-C-ACT---         |
| Mpa                        | ---C-C-A-C---         | -C---C-C---          | -C-A-A-C-A-C-A-G-             | ---C-C-C-G---           |
| Mba                        | -T-C-G-G-A-T---       | -A---T-T-ACT---      | -C-A-A-T-A-T-A-A-             | ---T-T-ACT---           |
| Mpe                        | ---C-G-G-C-T---       | -T---T-T---          | -C-A-G-T-F-C-A-G-             | ---T-T-T---             |
| Mcp                        | ---C-C-A-A---         | -A---C-T---          | -C-C-A-C-A-C-C-G-             | ---C-T-G---             |
| Mli                        | -T-G-G-G-C---         | -C---C-G-C---        | -C-C-A-C-C-C-C-G-             | ---C-G-C---             |
| Mnt                        | -T-C-C-A-G---         | -T---T-C-ACT---      | -C-A-G-C-C-T-A-A-             | ---T-C-ACT---           |
| primer name (position*)    | nifH2 (115-131)       | nifH (460-476)       | IGK3 (19-47)                  | DVV (388-413)           |
| primer sequence (5' to 3') | TGAGATGAAARINIGIA     | ADNGGCATCATYTRCC     | GIWVHTAYGGIARBRGGIGIARIGGGLAA | AVTGRRAALICIGRUALIACITC |
| Mbo                        | ---C-C-G-A-G---       | -GG---G-T-C---       | --AA-T-C-A-A-C-T-C-A-         | --G-A-A-A-C-G-G-C-A-    |
| Mac                        | -C-C-A-A-A---         | -TT---T-T---         | --AA-T-A-A-G-C-C-T-A-         | -G-A-A-A-T-G-C-G-G-     |
| Mmg                        | -T-C-C-A-A---         | -TT---T-C---         | --AA-C-C-A-G-C-T-A-A-         | -G-A-A-T-G-C-G-G-       |
| Mpa                        | -C-C-C-A-C---         | -GC---C-C---         | --AA-C-C-A-A-C-A-C-A-         | -C-G-C-C-G-G-G-A-       |
| Mba                        | -T-C-G-G-A---         | -TA---T-T---         | --AA-C-C-A-A-T-A-T-A-         | -A-A-T-A-A-C-A-A-       |
| Mpe                        | ---C-G-G-C---         | -GT---T-T---         | --AA-T-C-A-G-T-F-C-A-         | -T-G-T-F-G-T-G-A-       |
| Mcp                        | -C-C-A-A---           | -GA---C-T---         | -CA-T-C-C-A-C-A-C-C-          | -A-G-G-G-G-G-G-G-       |
| Mli                        | -C-T-G-G-C---         | -GC---C-G---         | --AA-T-C-A-A-C-C-C-C-         | -G-G-G-G-G-G-G-G-       |
| Mnt                        | -T-C-C-A-G---         | -TT---T-C---         | --AA-C-C-A-A-G-C-T-A-         | --G-A-A-T-G-T-G-T-G-    |

\* Relative to the *nifH* sequence of *Acetobacter vinlandii* (Genbank ACCN9 M20568)

<sup>b</sup> The following abbreviations represent species names: Mbo, Candidatus *Methanoregula boomeri* GA8; Mac, *Methanosarcina acetivorans* C2A; Mmg, *Methanosarcina mazei* Go1; Mpa, *Methanosphorobacter palustris* EU-9; Mba, *Methanosarcina barkeri* str. Fusaro; Mpe, *Methanoplanus porphyreus* DSM 11571; Mep, *Methanosarcina concili* GP9; Mli, *Methanofollis liminatans* DSM 4140; Mnt, *Methanosarcina muzzeyi* Tuzo1. The - symbol represents conserved positions whose nucleotides match those of the primer sequence above, bold letters indicates nucleotides in degenerate positions of the primer, and red letters indicate primer-template mismatches.

## References

1. **Esson, K. C., X. Lin, D. Kumaresan, J. P. Chanton, J. C. Murrell, J. E. Kostka.** 2016. Alpha-and gammaproteobacterial methanotrophs codominate the active methane-oxidizing communities in an acidic boreal peat bog. *Appl Environ Microbiol* **82**:2363-2371.
-
